# Supplementary material for: Studies of wolf x coyote hybridization via artificial insemination
Source: PubMed Central journal article supplement (PMC5581171; doi:10.1371/journal.pone.0184342), 2017-09-01

3-month-old wolf x coyote hybrid

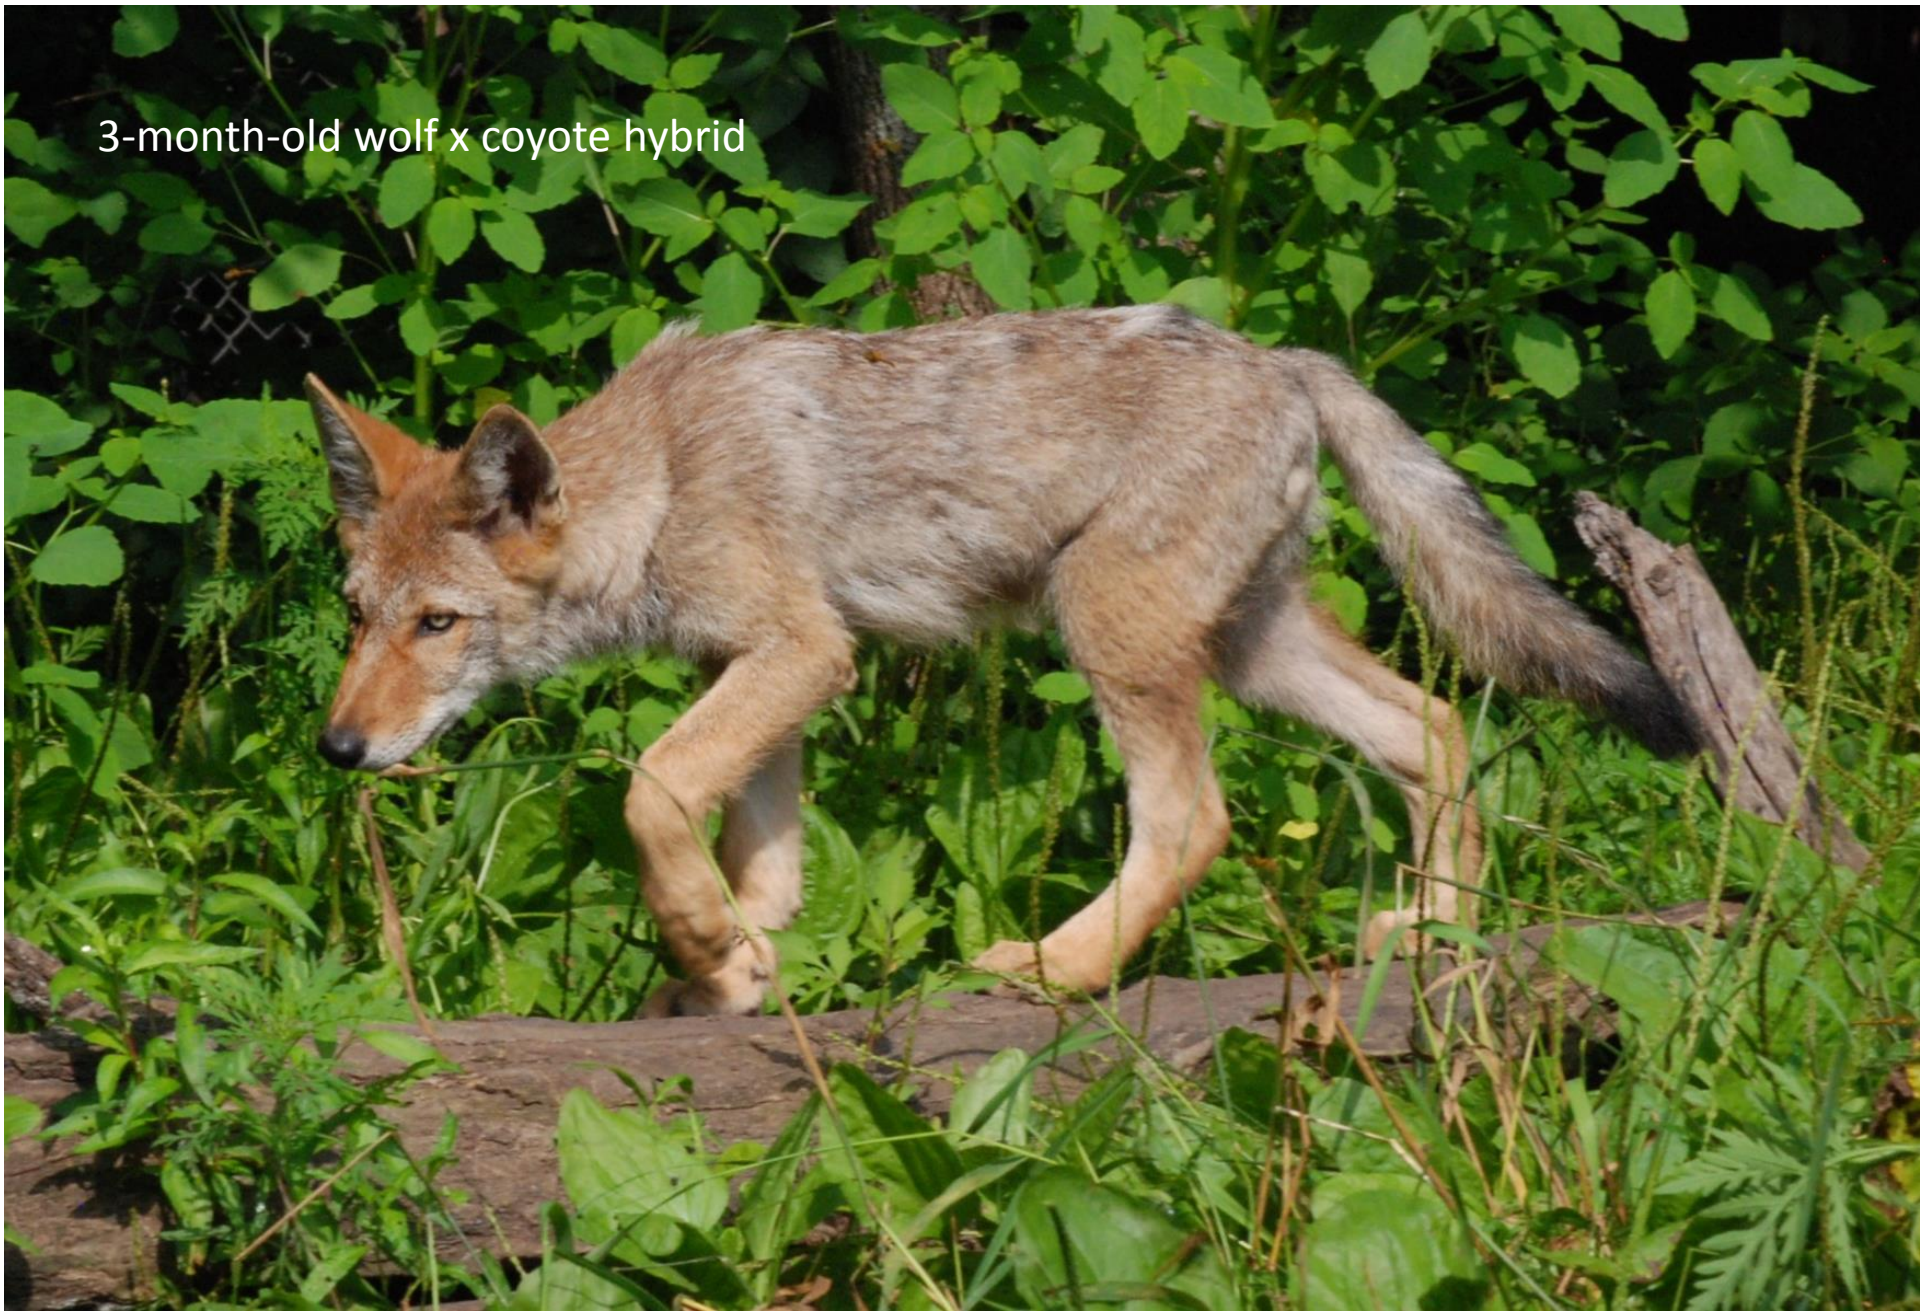

5-month old wolf x coyote hybrid

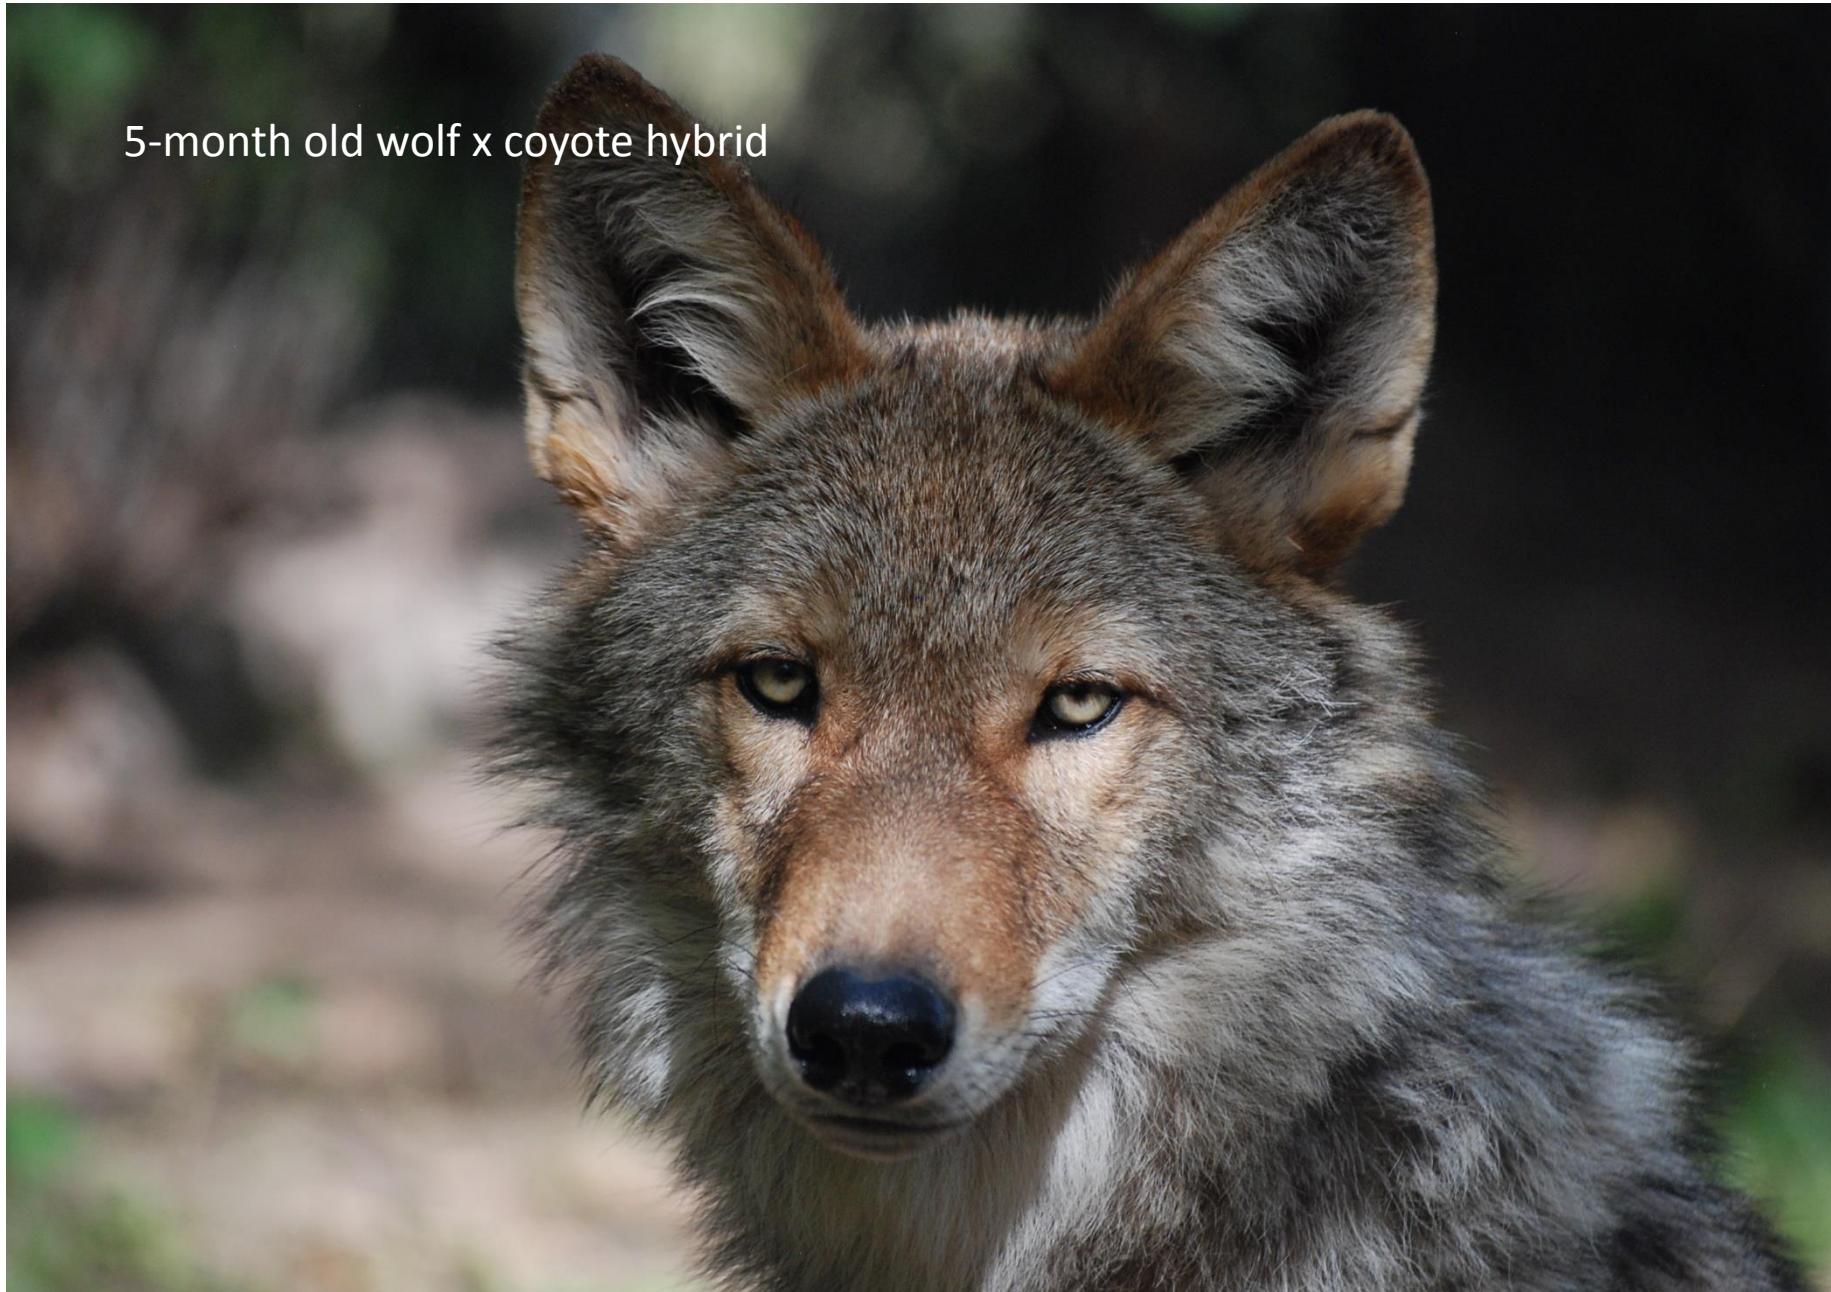

22-month-old  
wolf x coyote hybrid

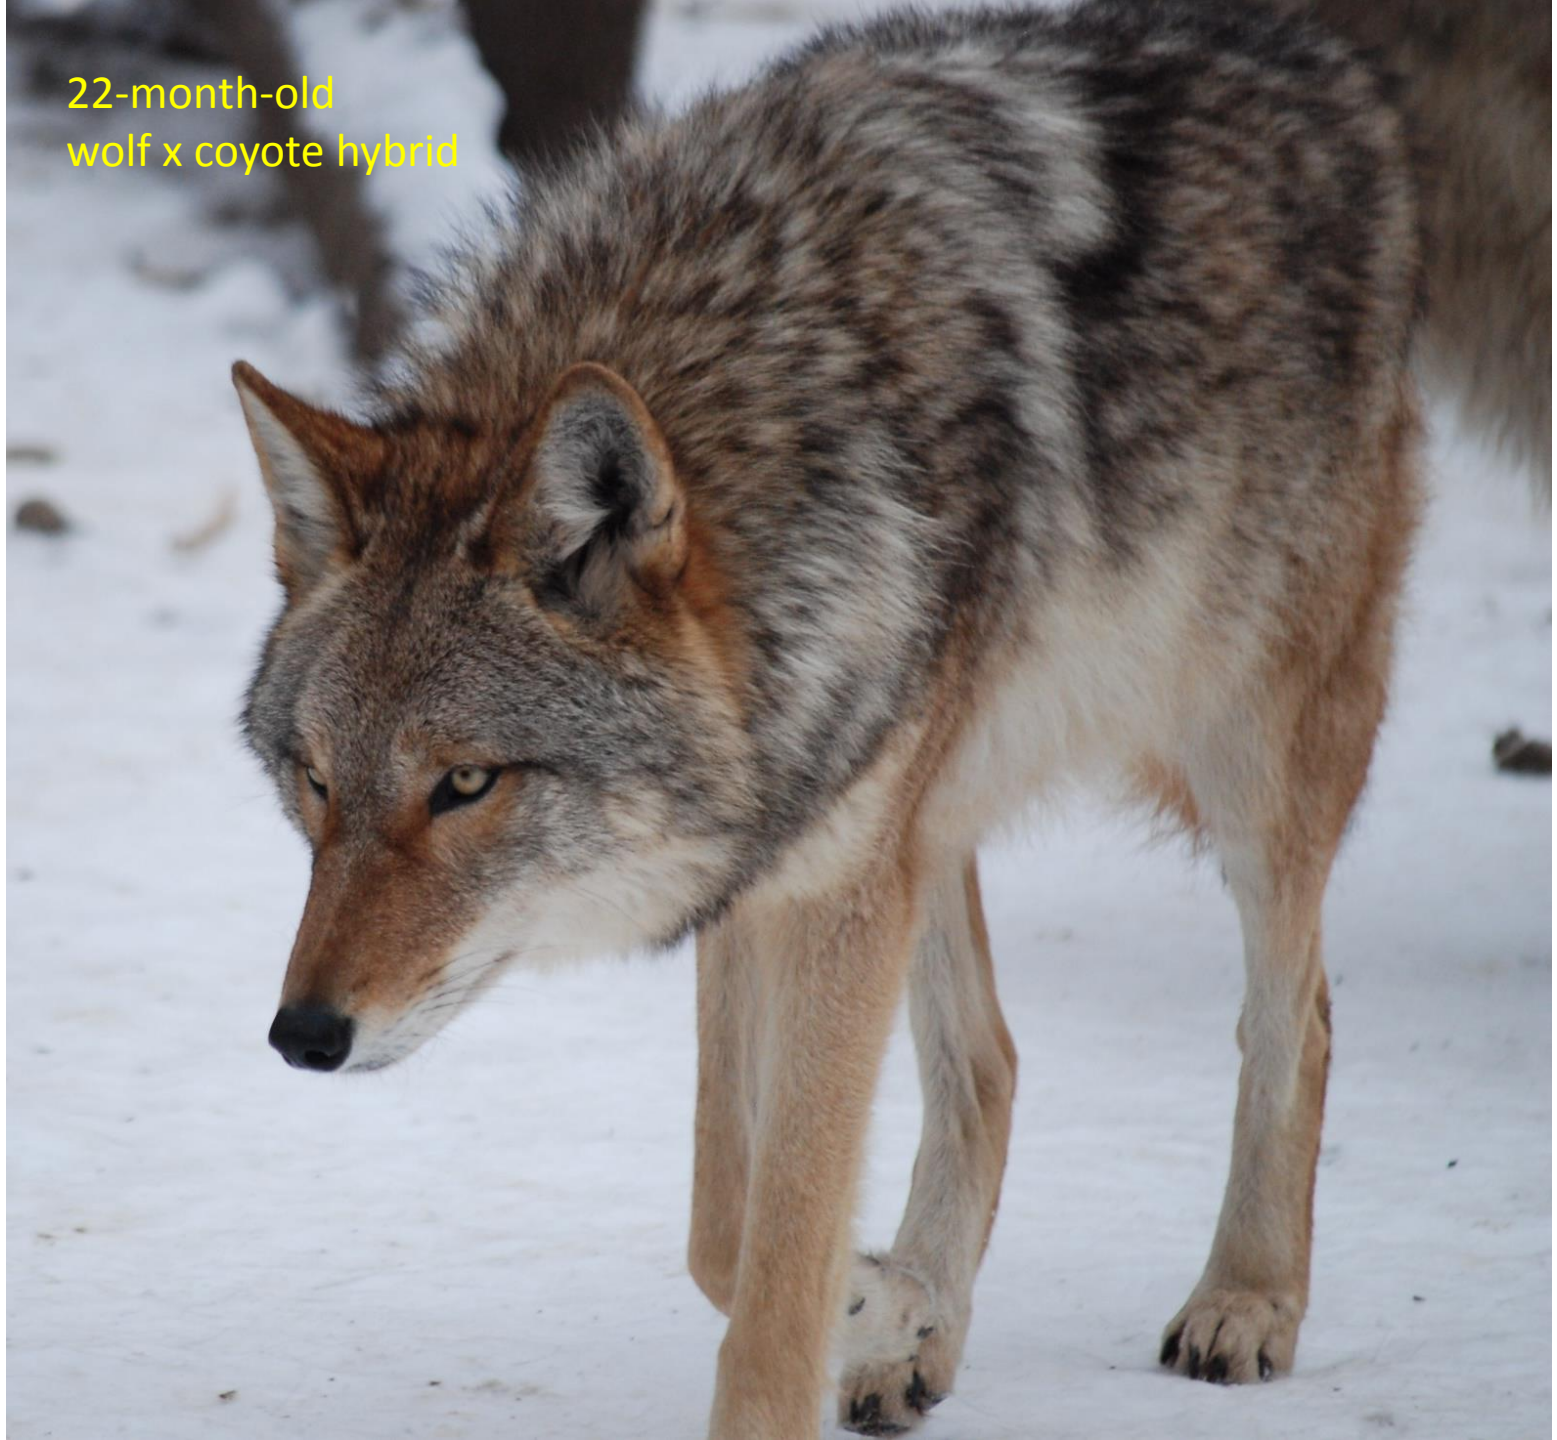

**21-week-old backcross  
female 001**

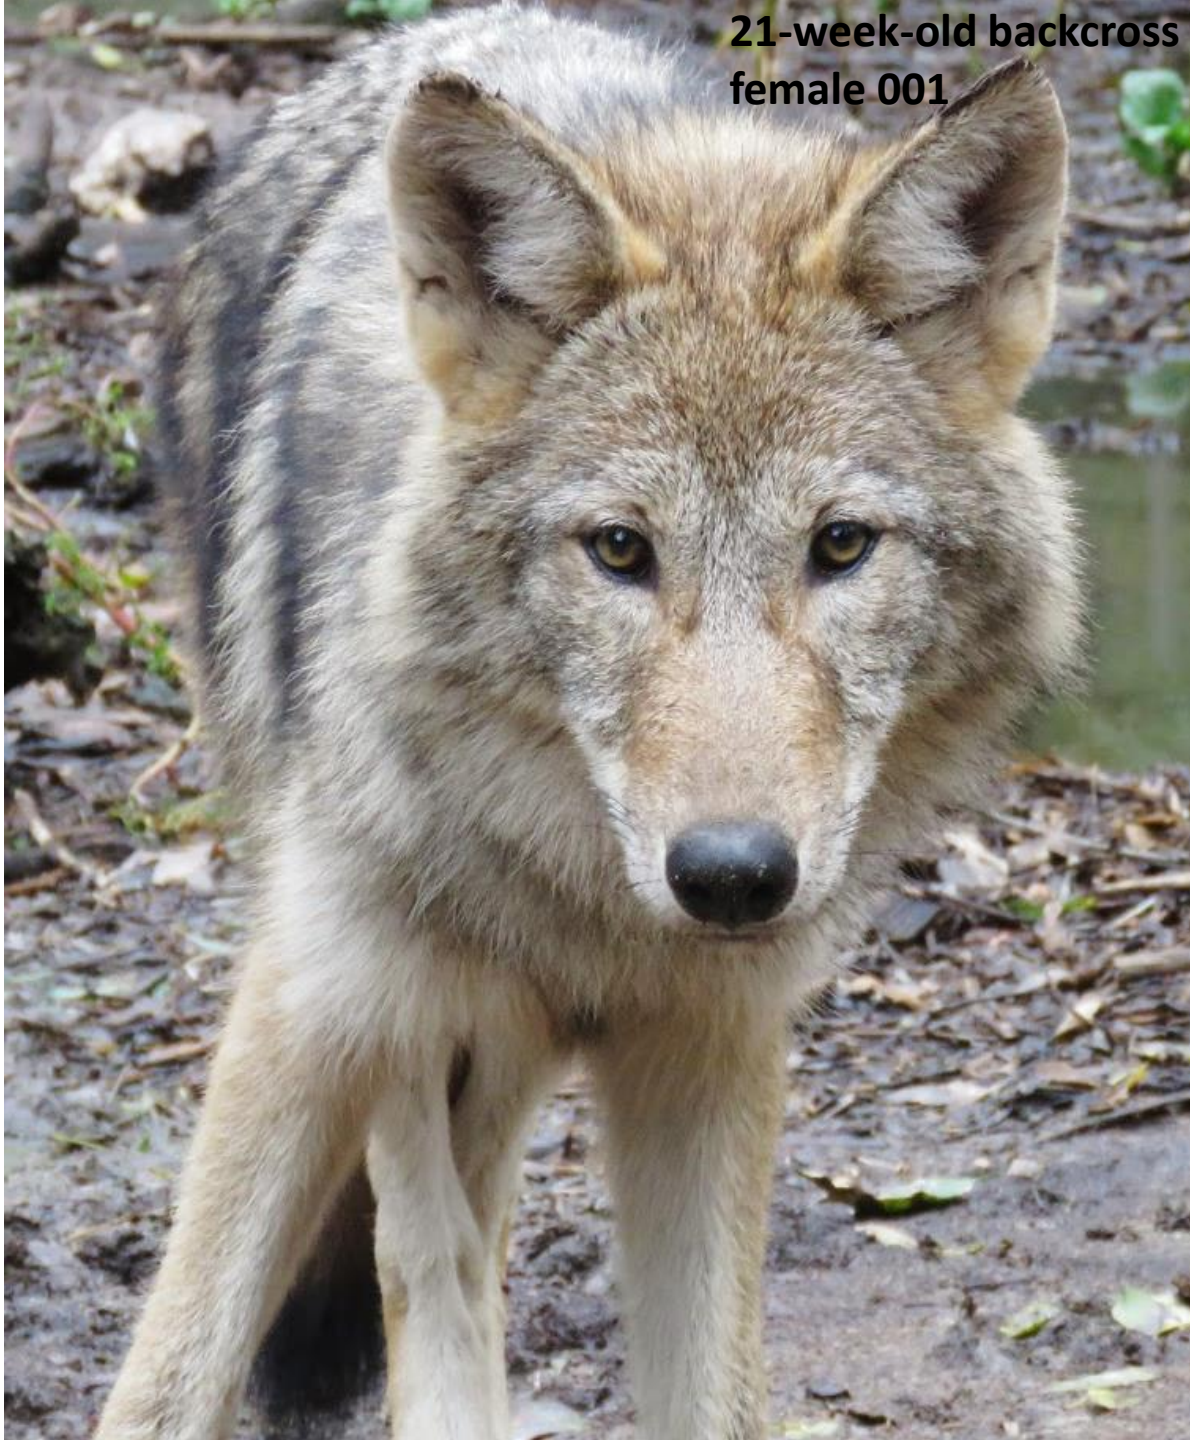

CW1

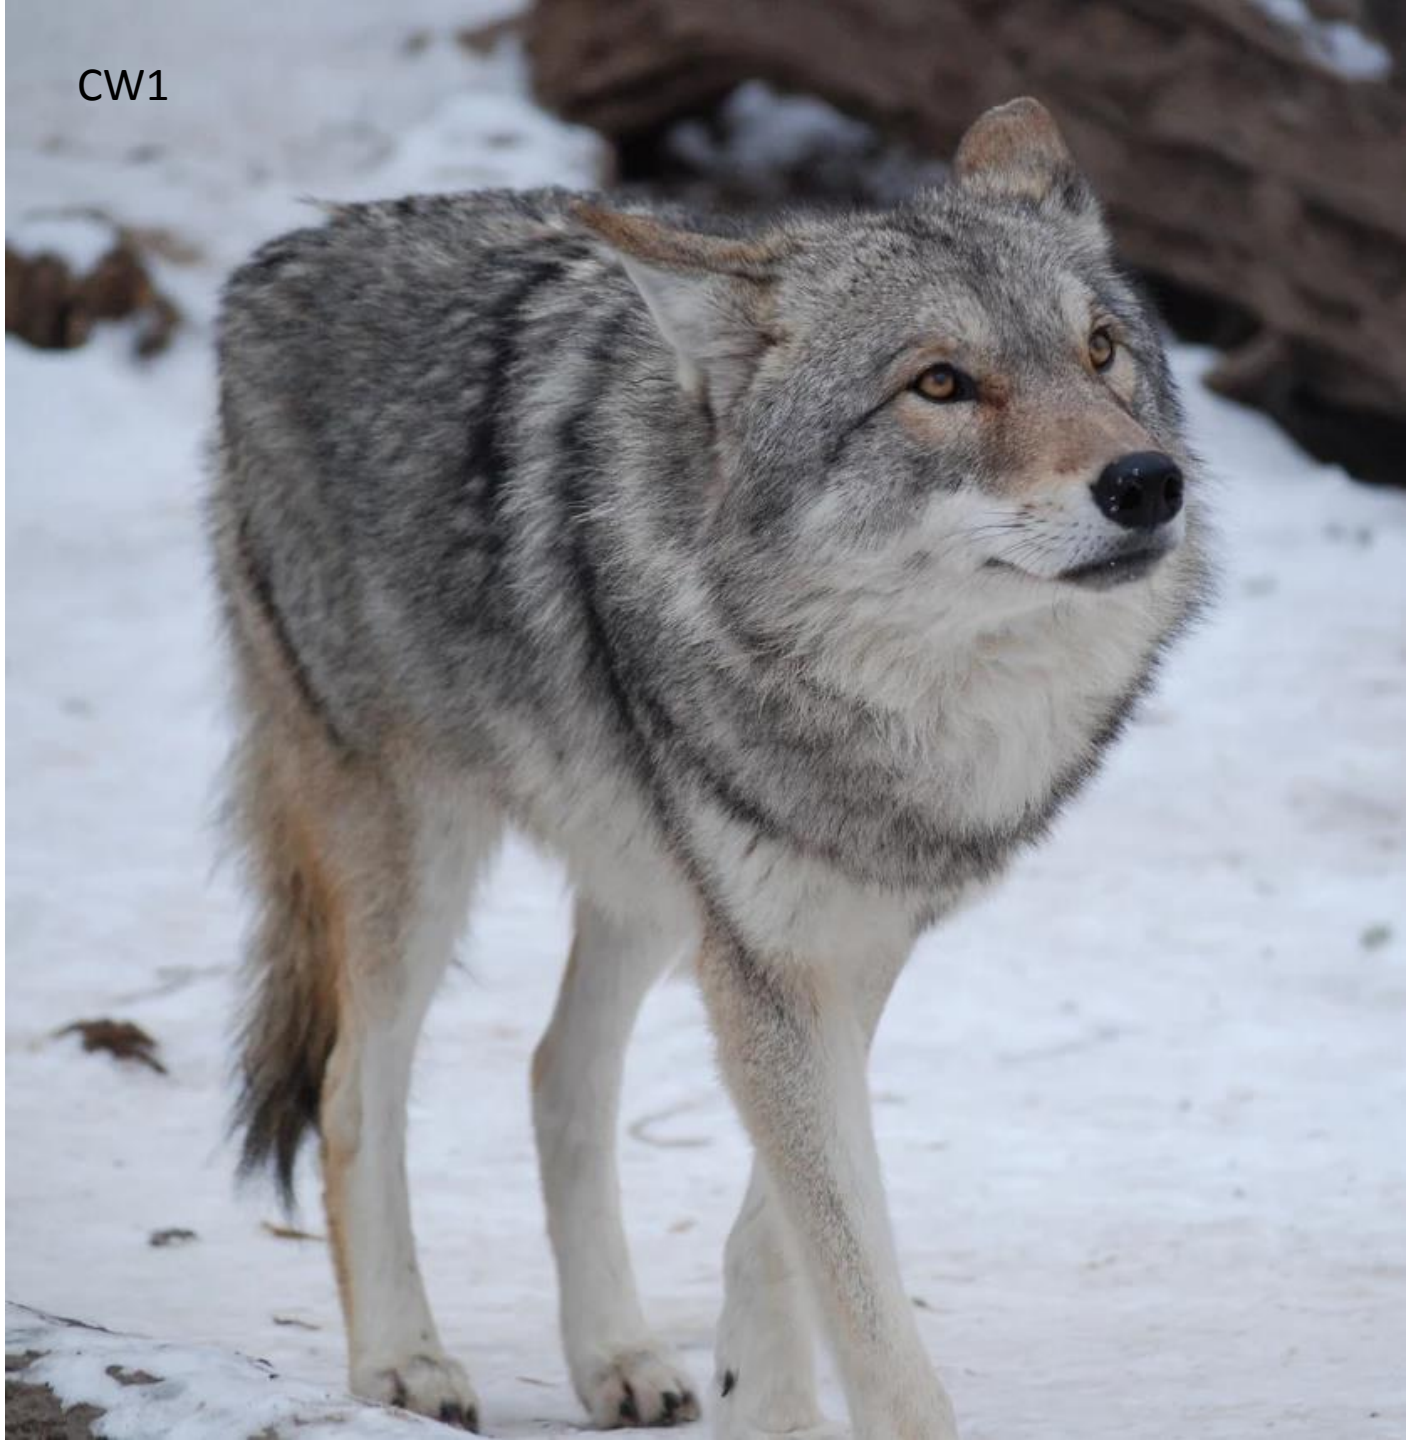

CW2

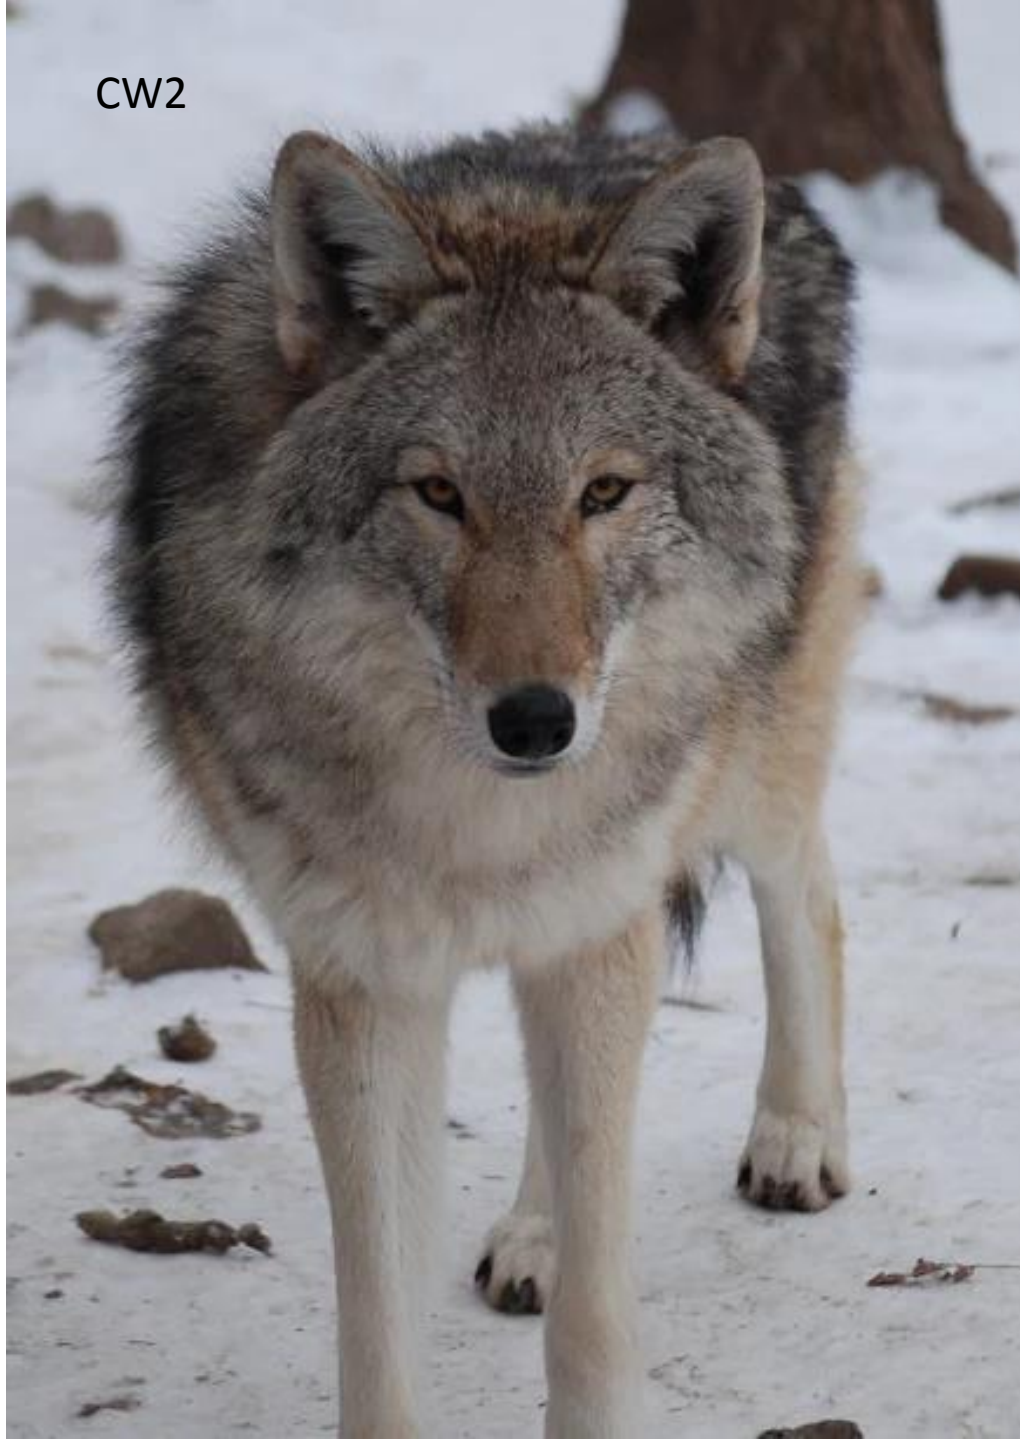

CW3

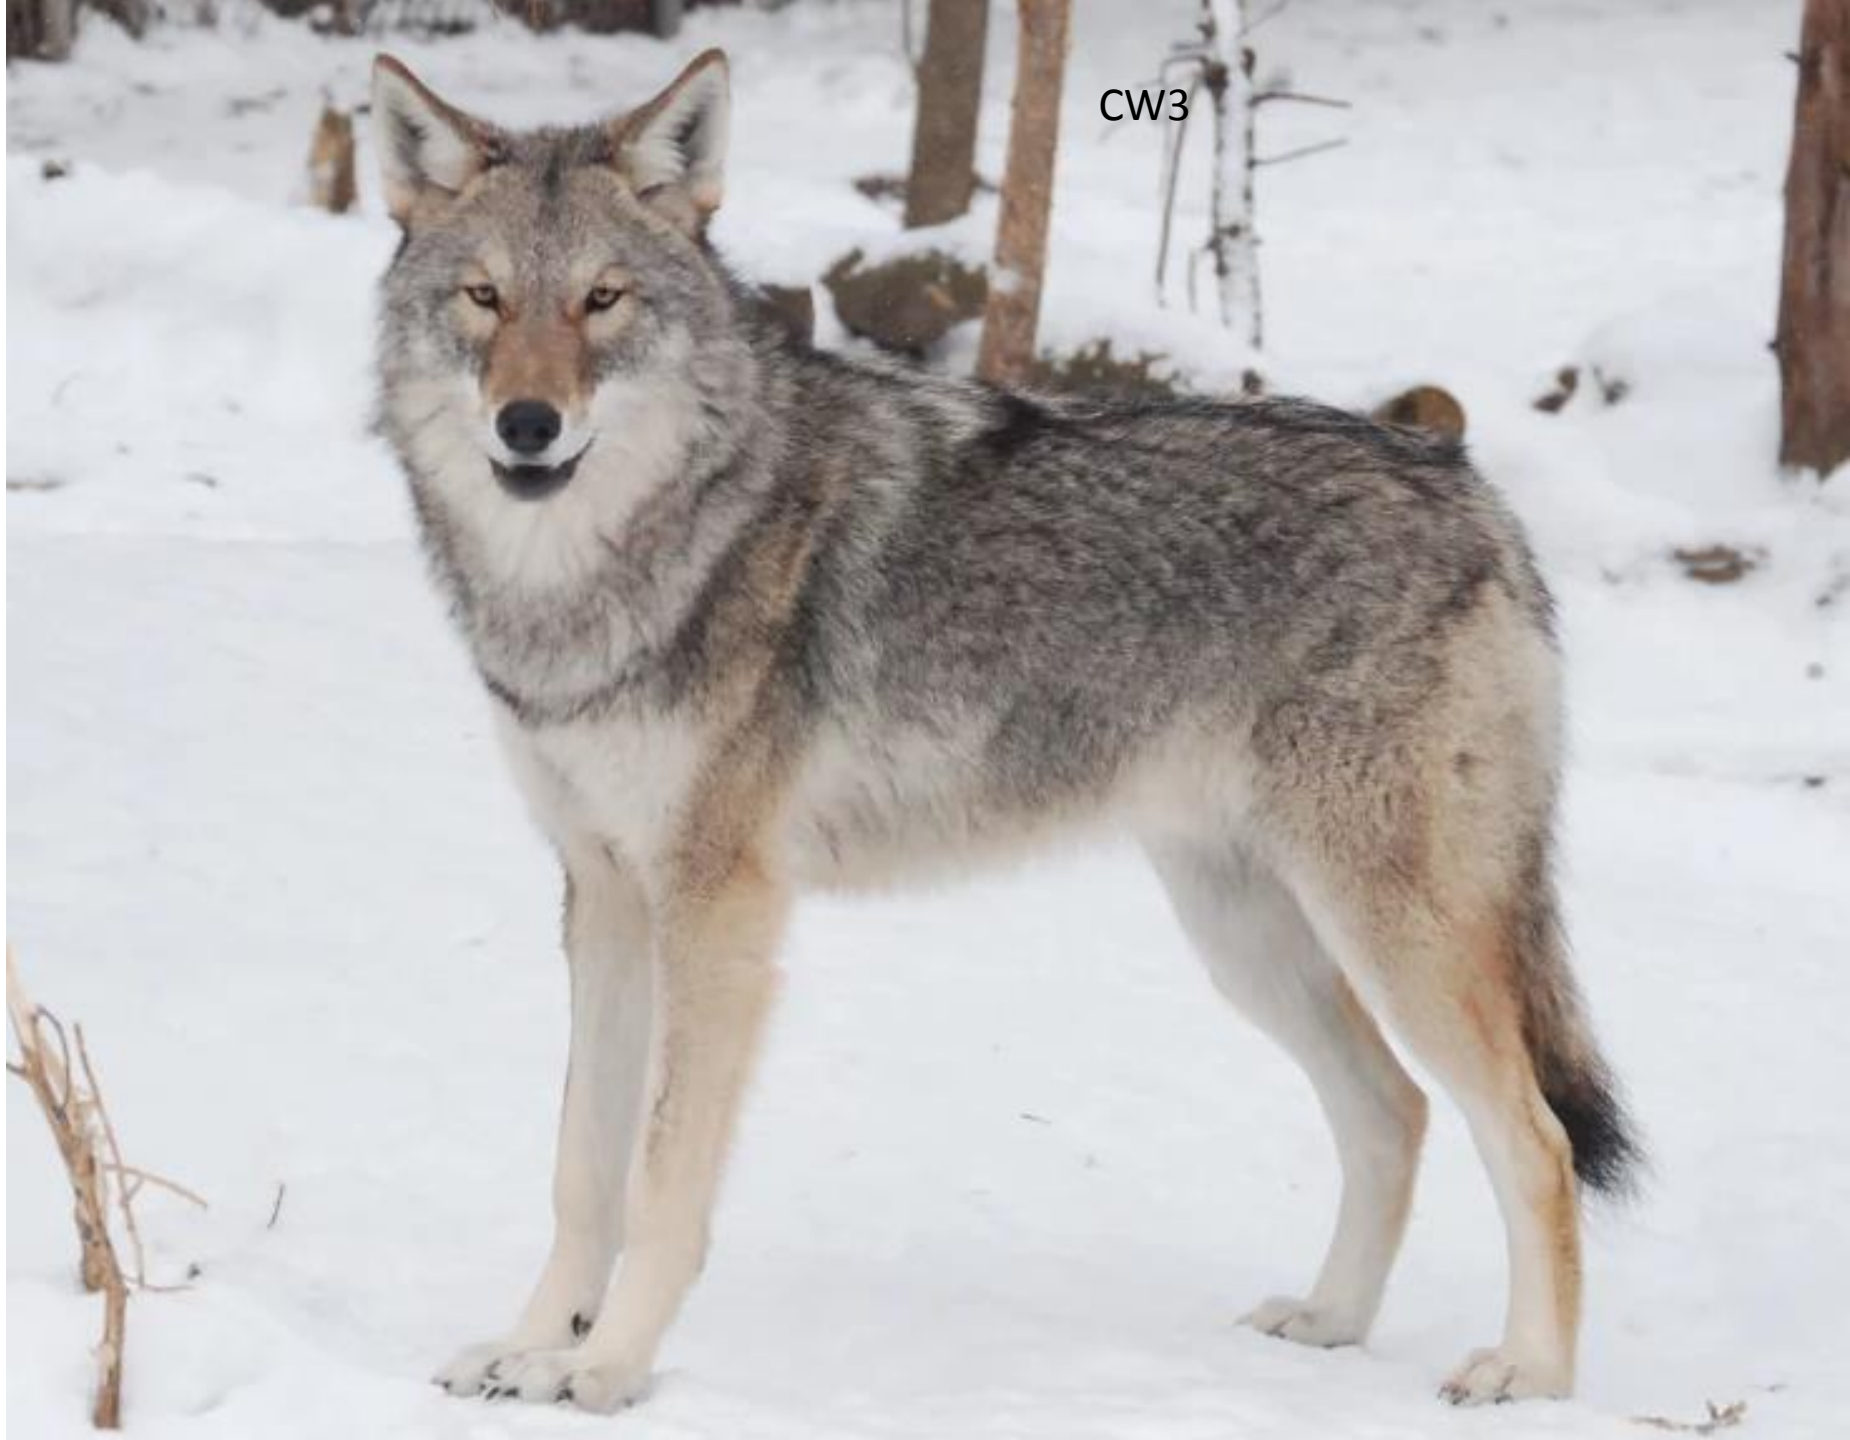

CW4

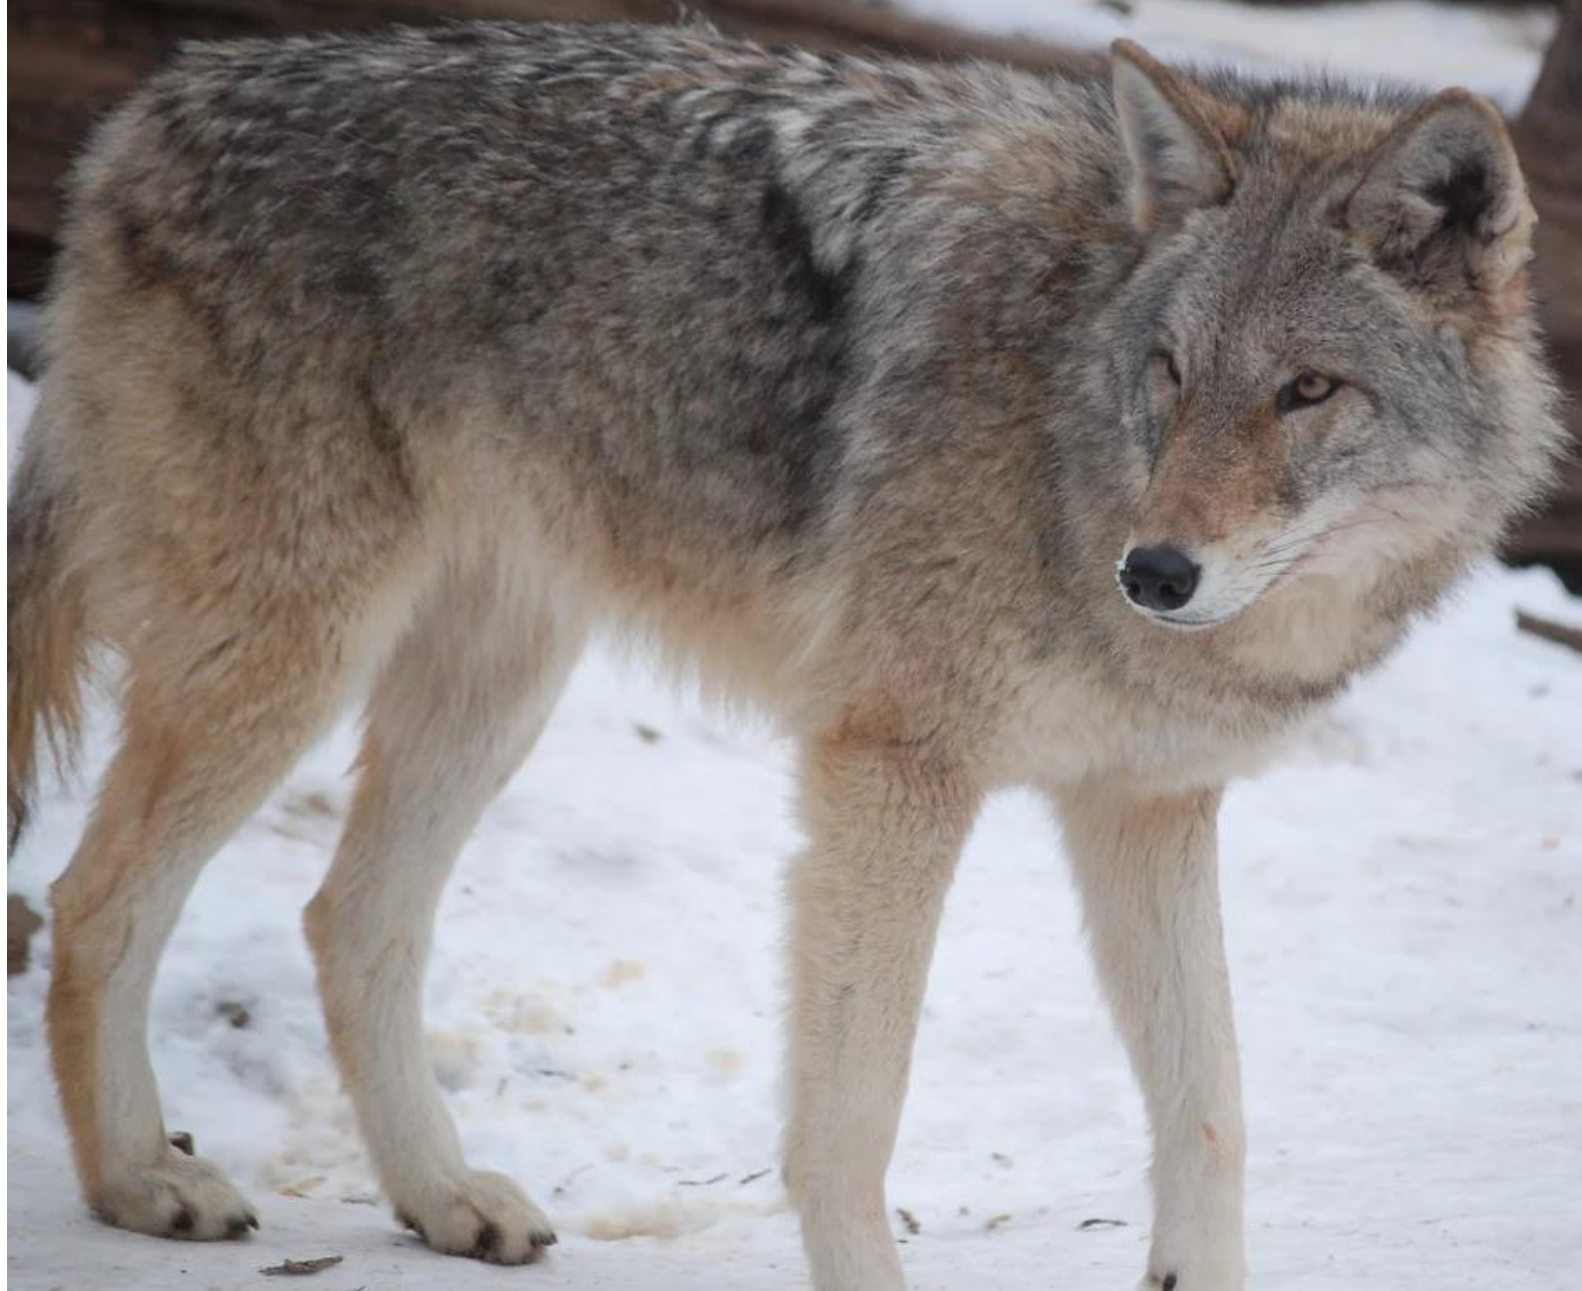



CW5

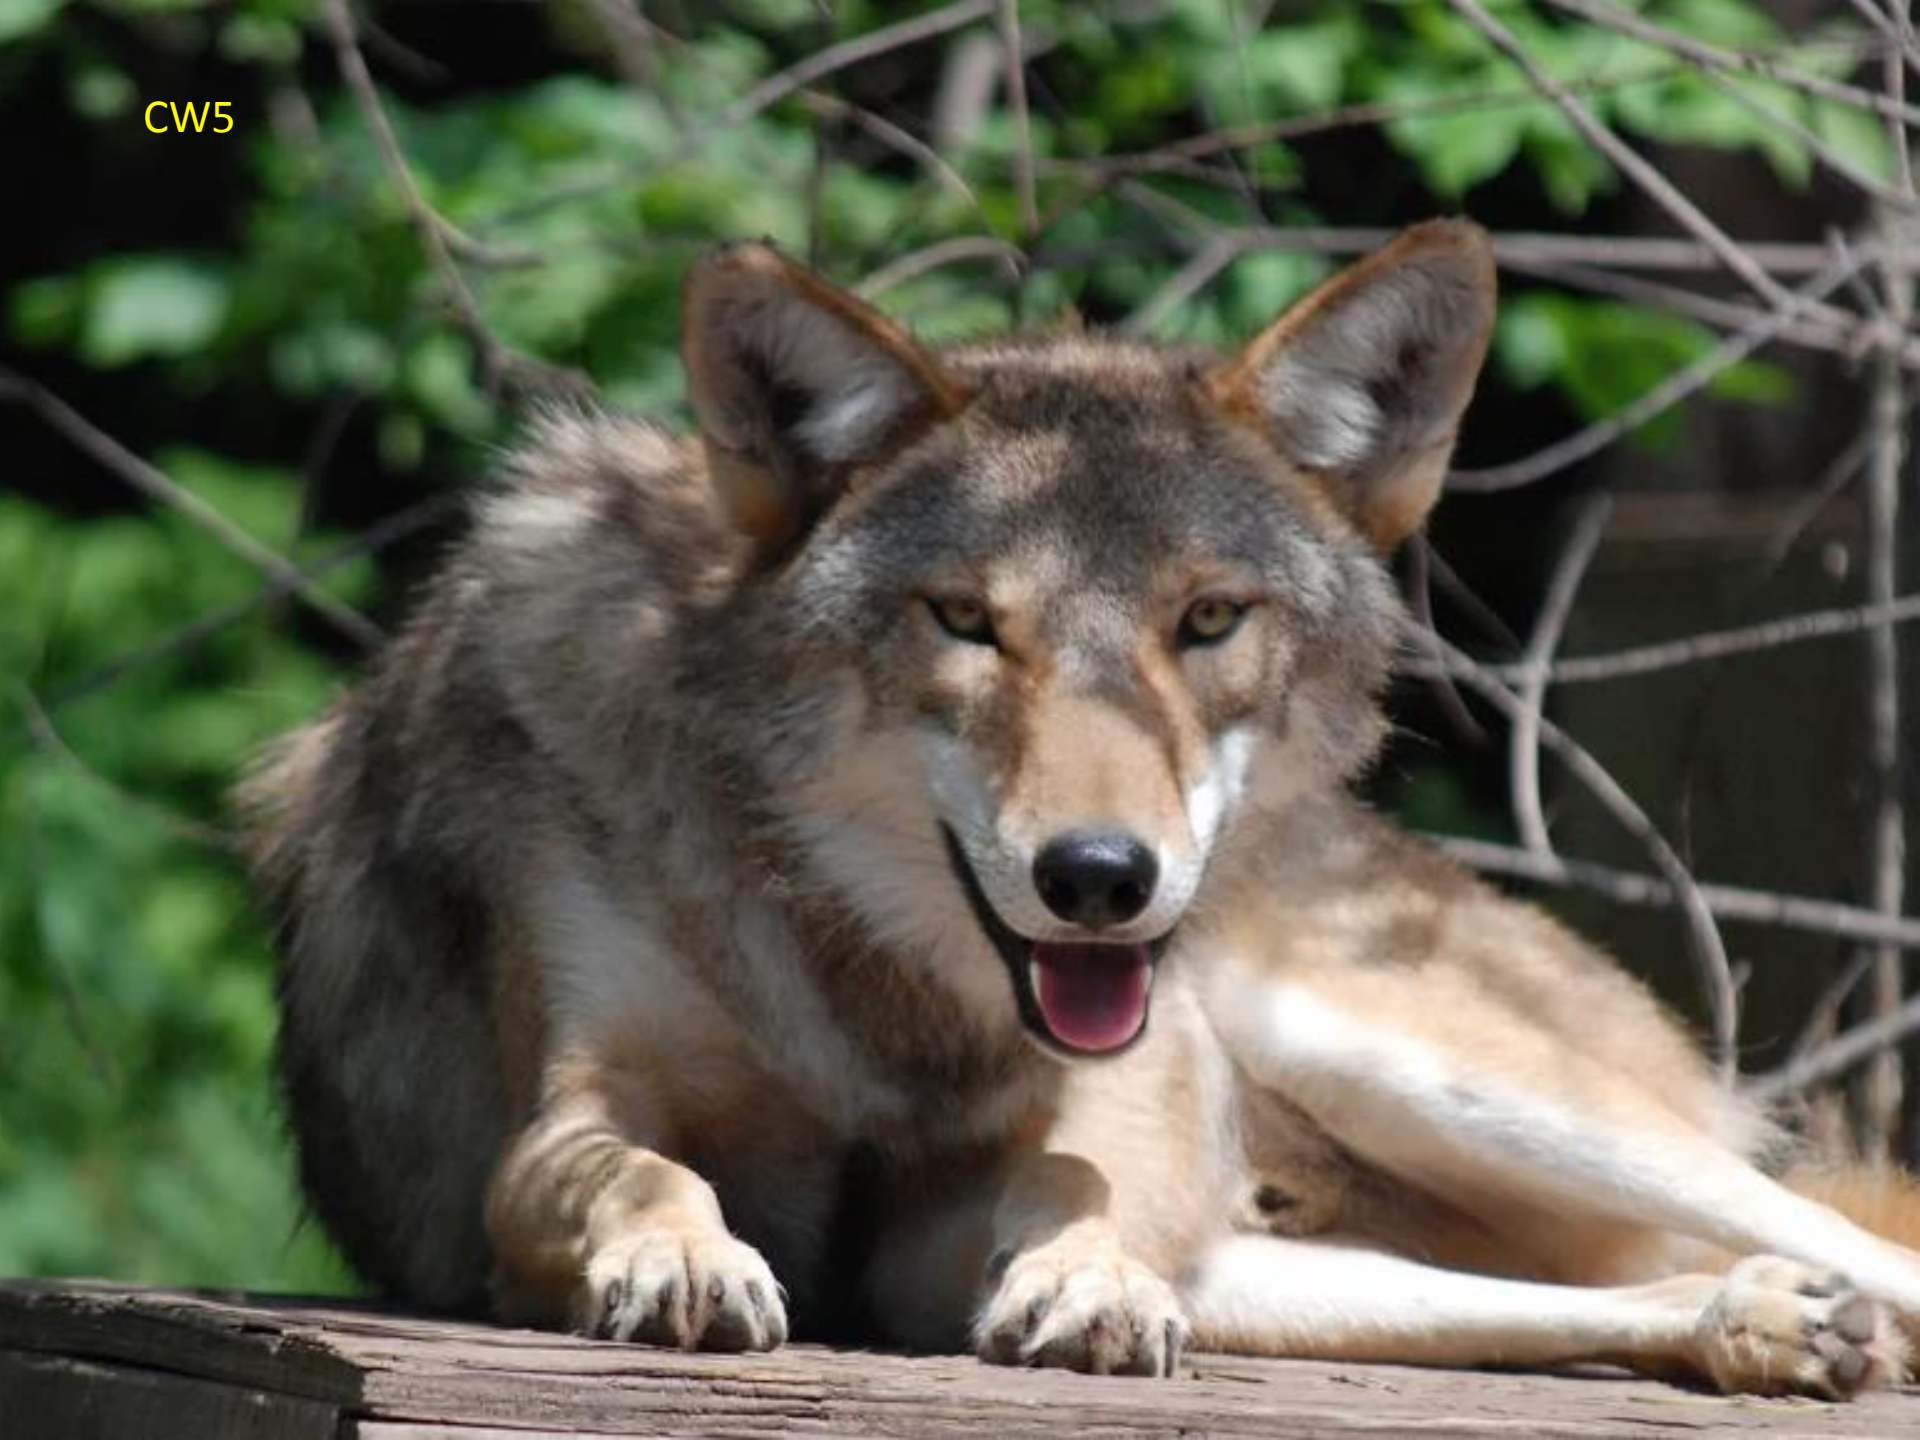

CW6

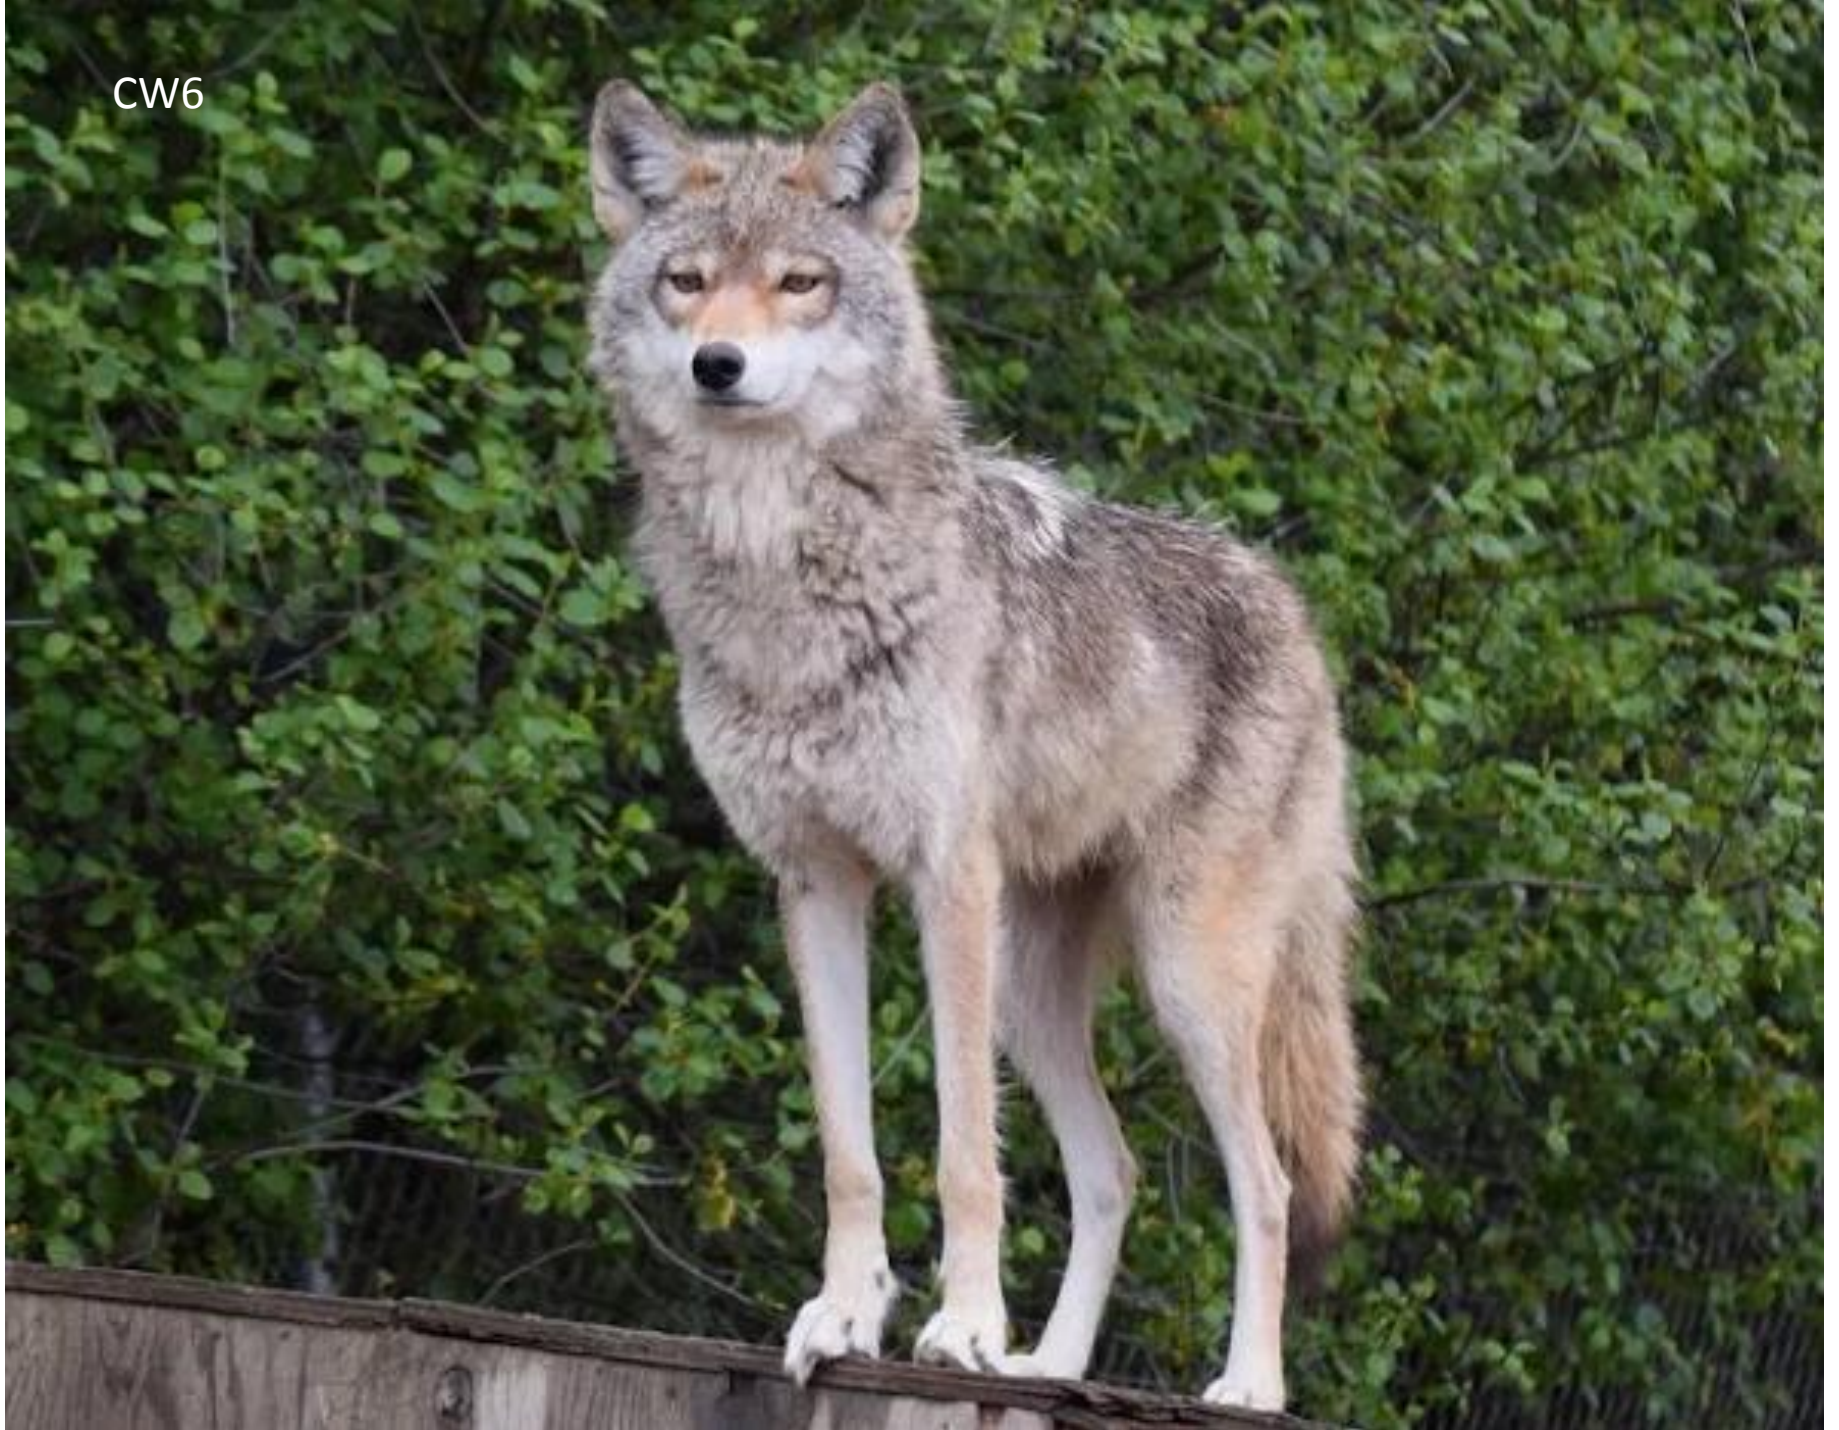

F2 CW/CW 1

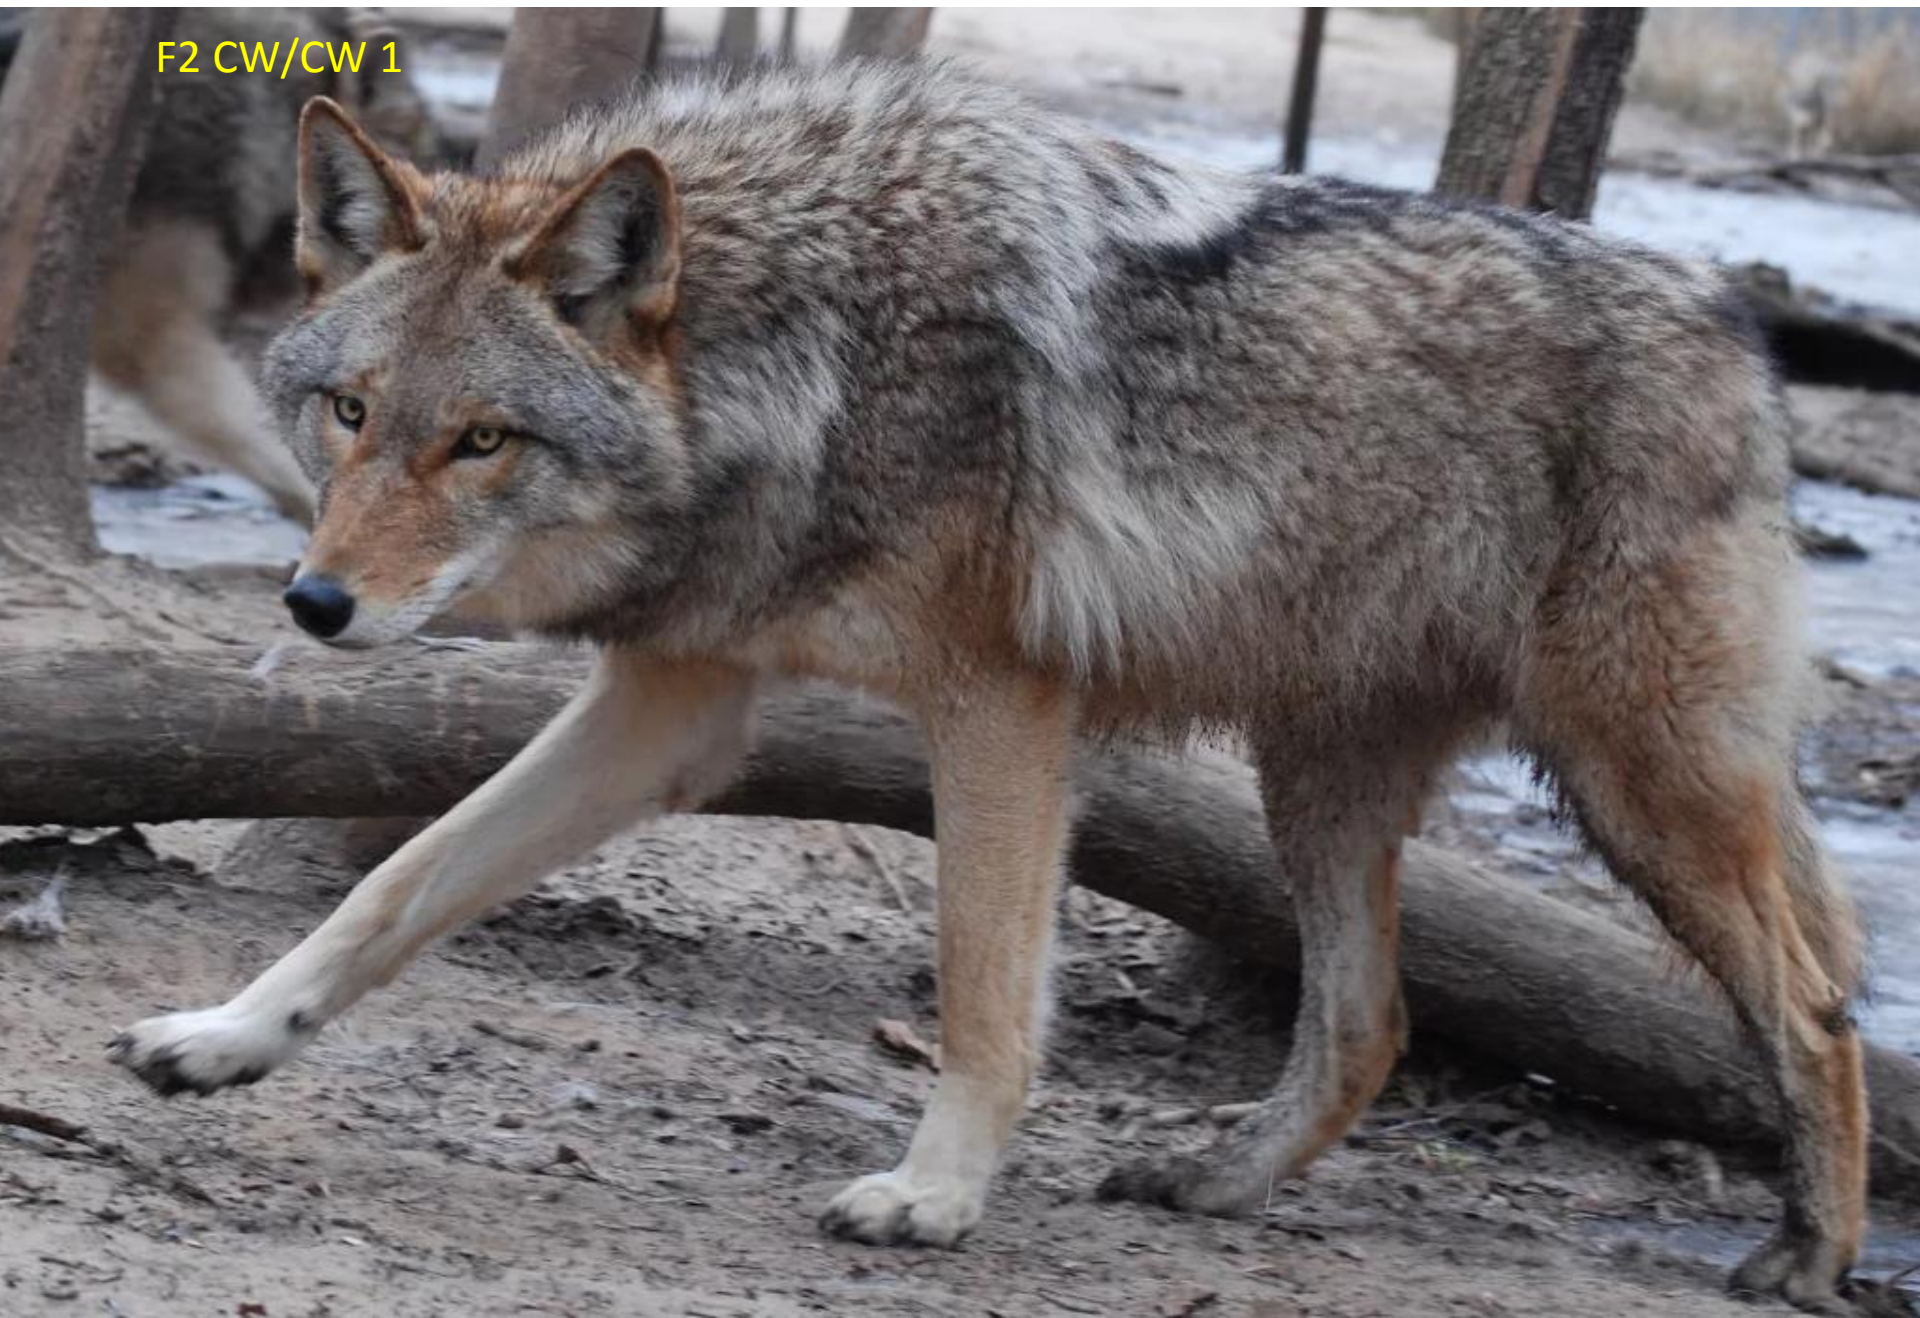

F2 CW/CW 2

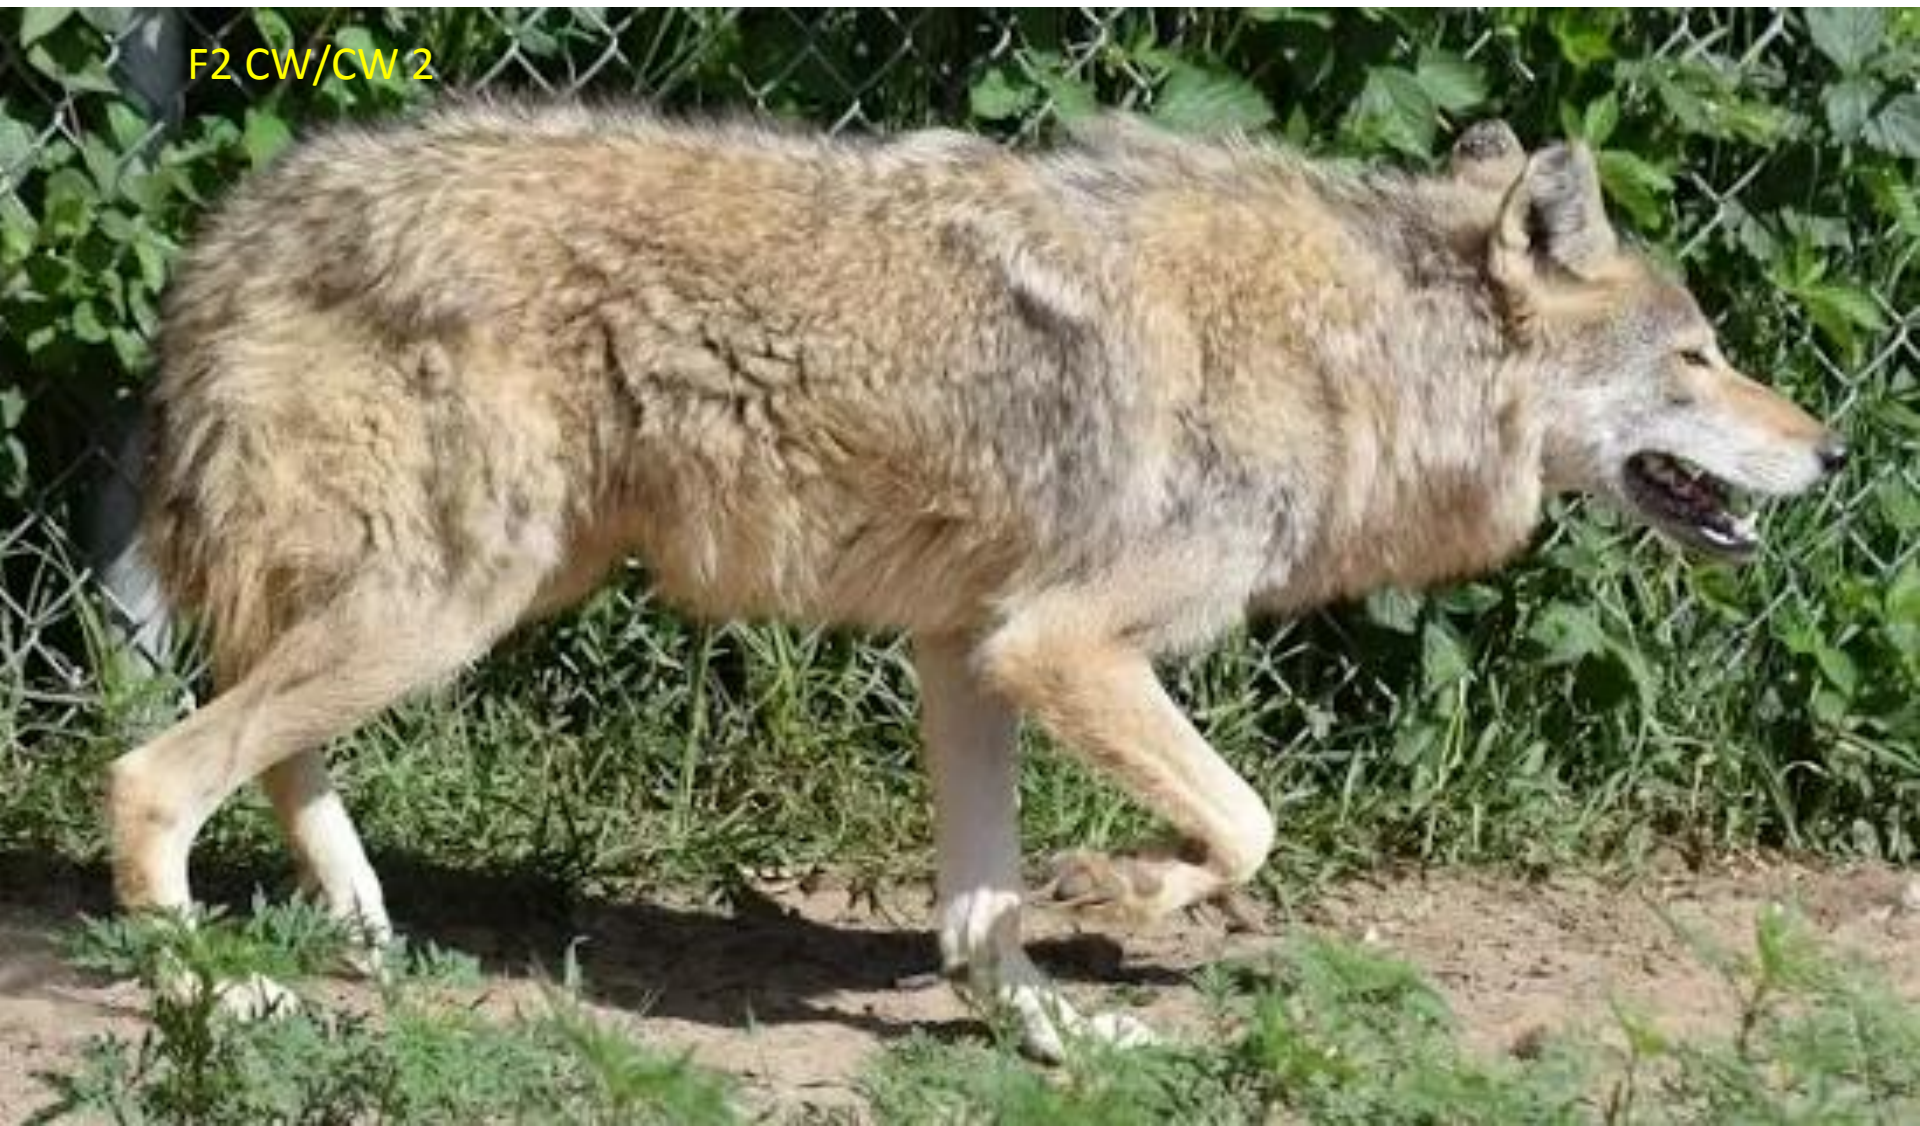

Backcross 001

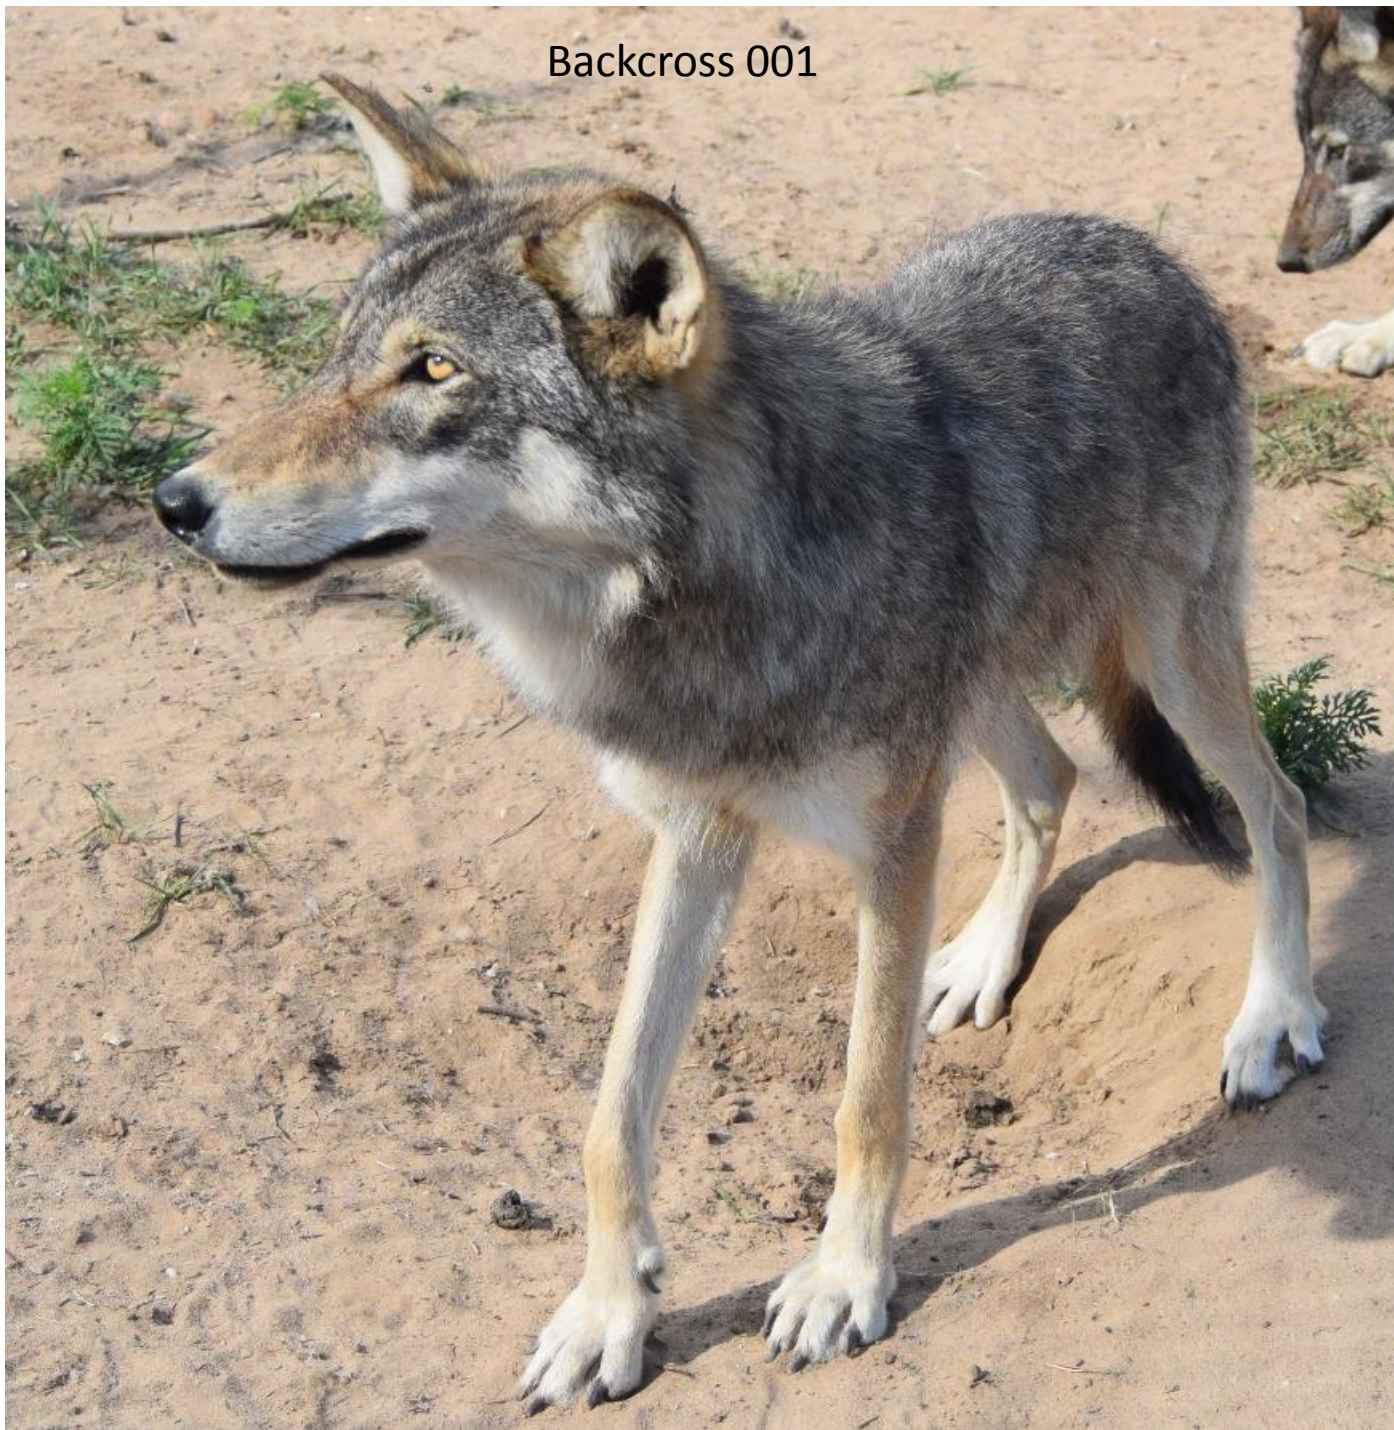

Backcross 002

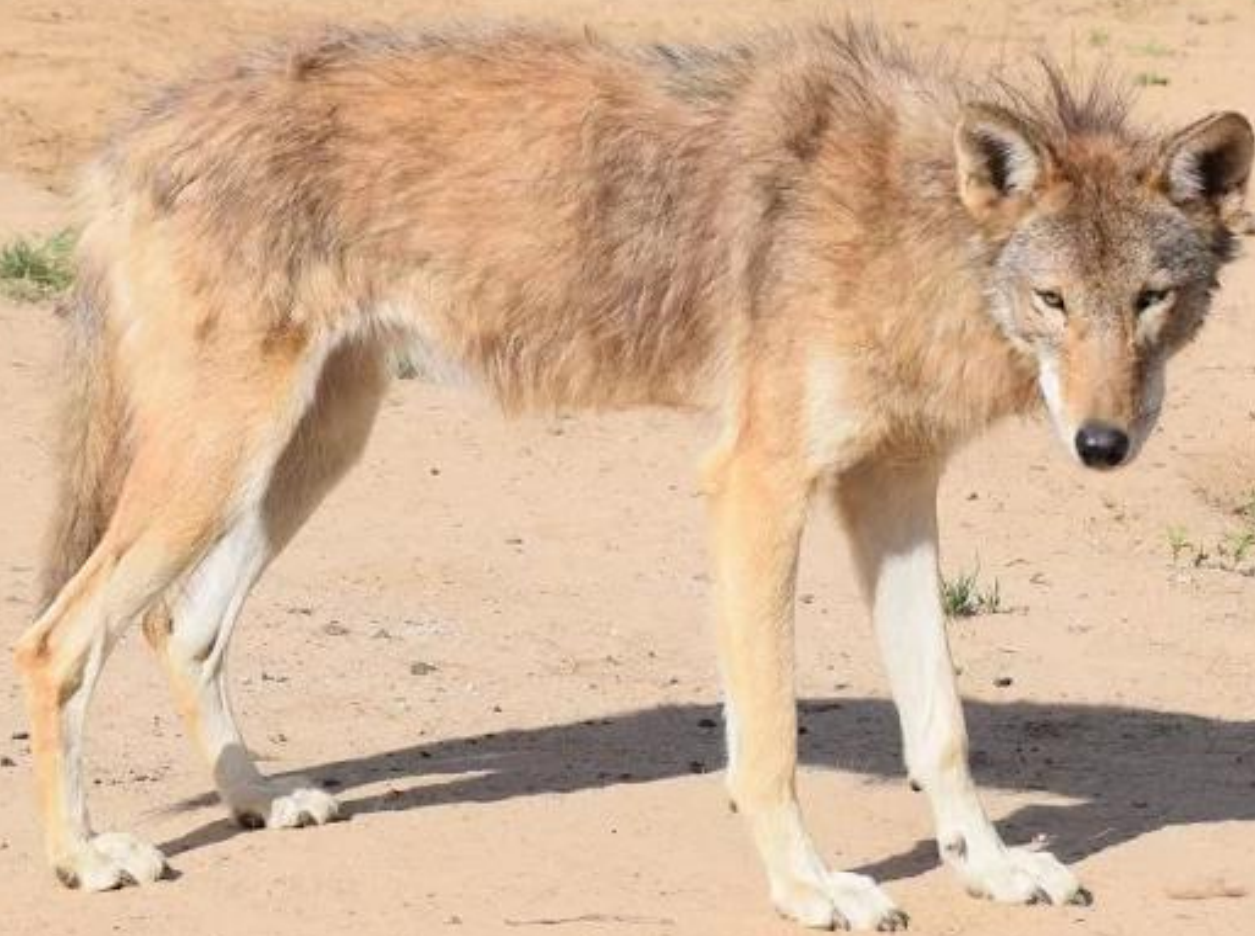

Backcross 004

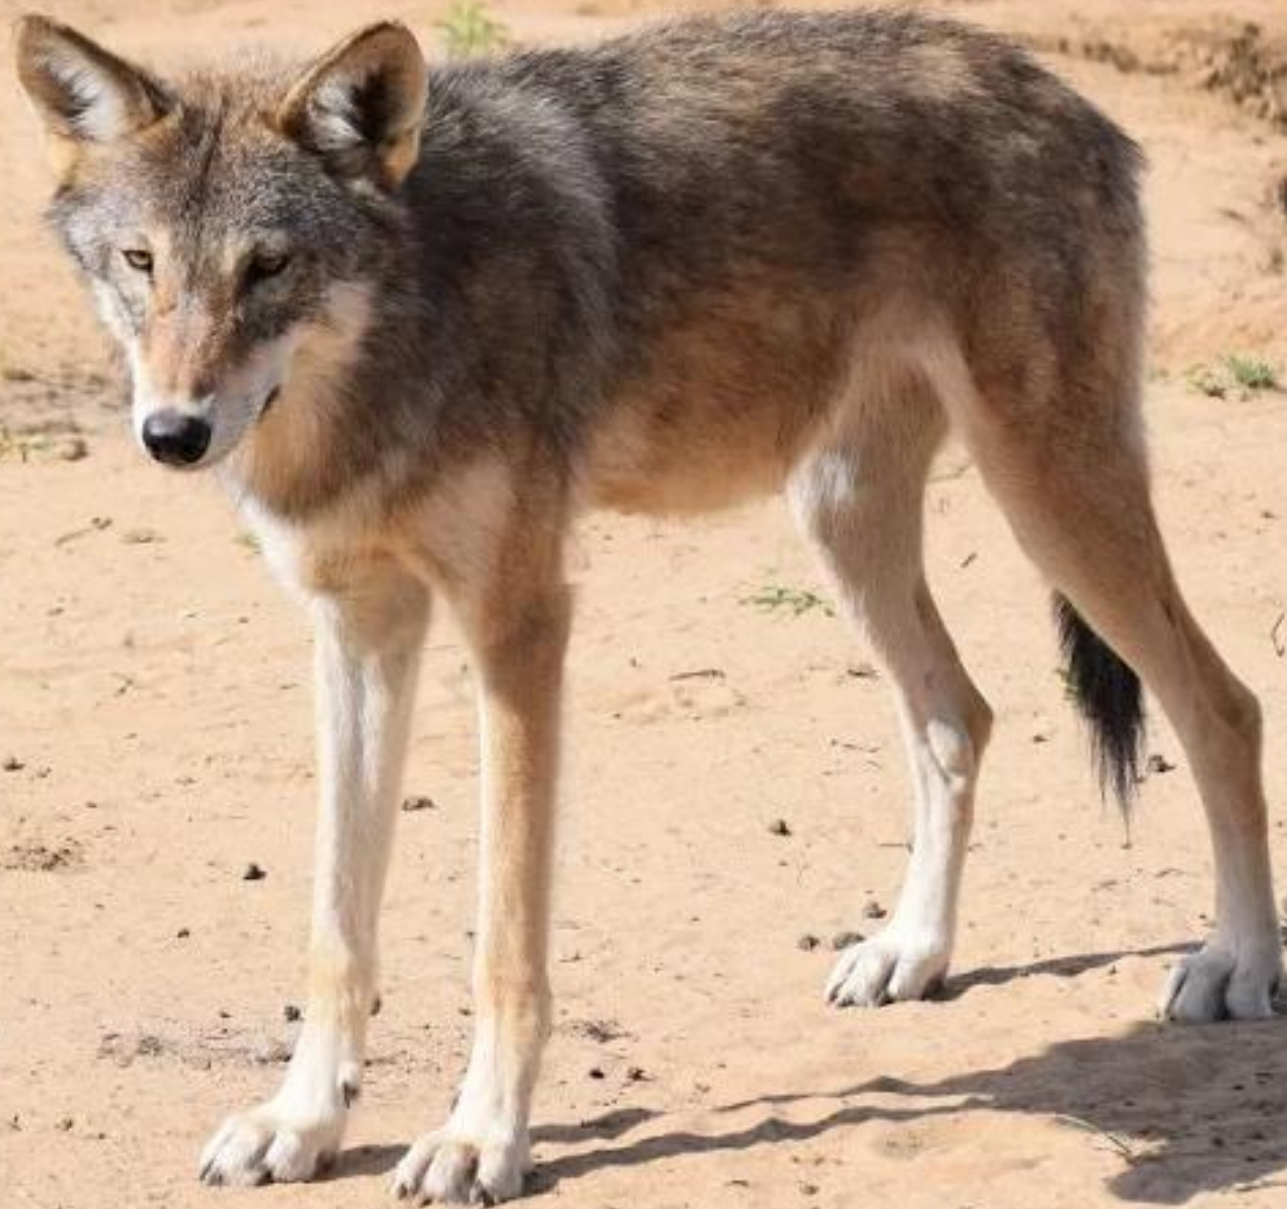

Backcross 005

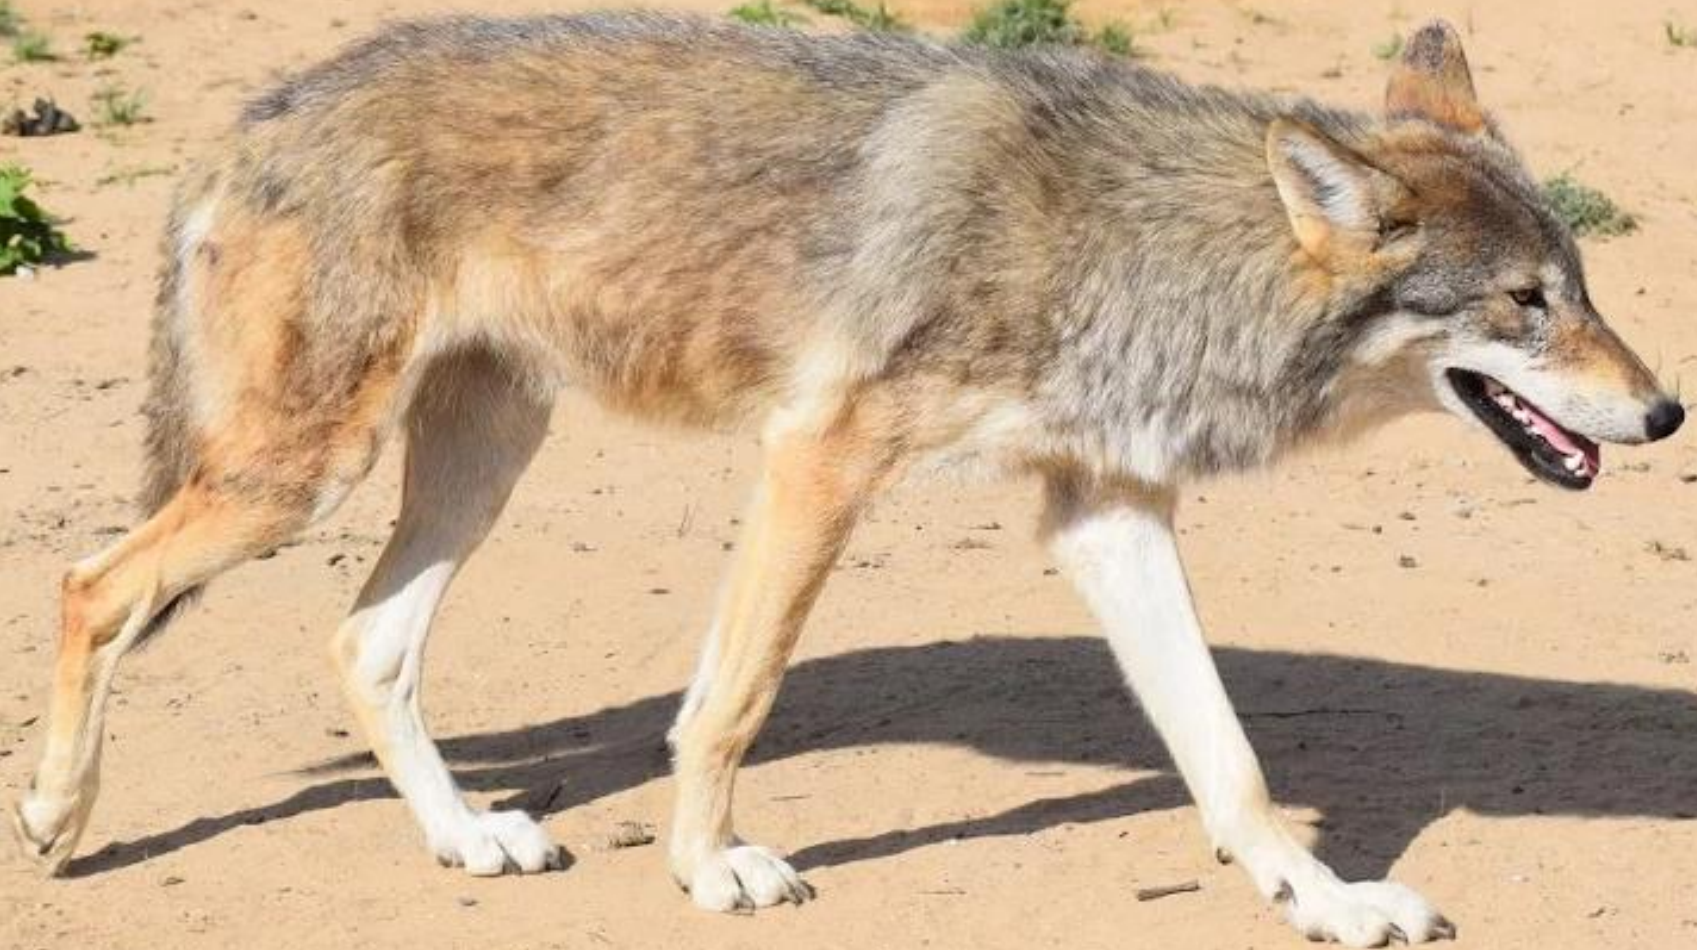

Supplement: pone.0184342.s001.pdf [file pone.0184342.s001.pdf]
